# Supplementary material
Source: PubMed Central journal article supplement (PMC2838313)

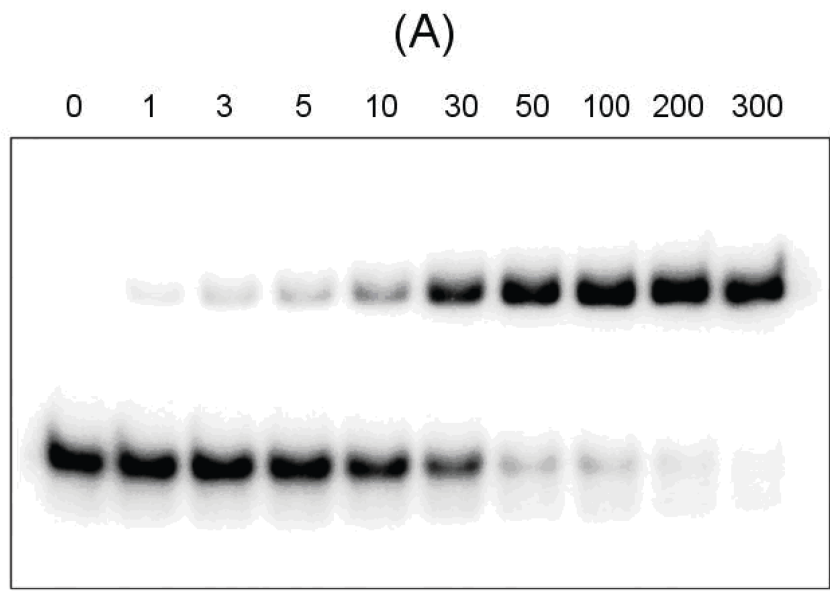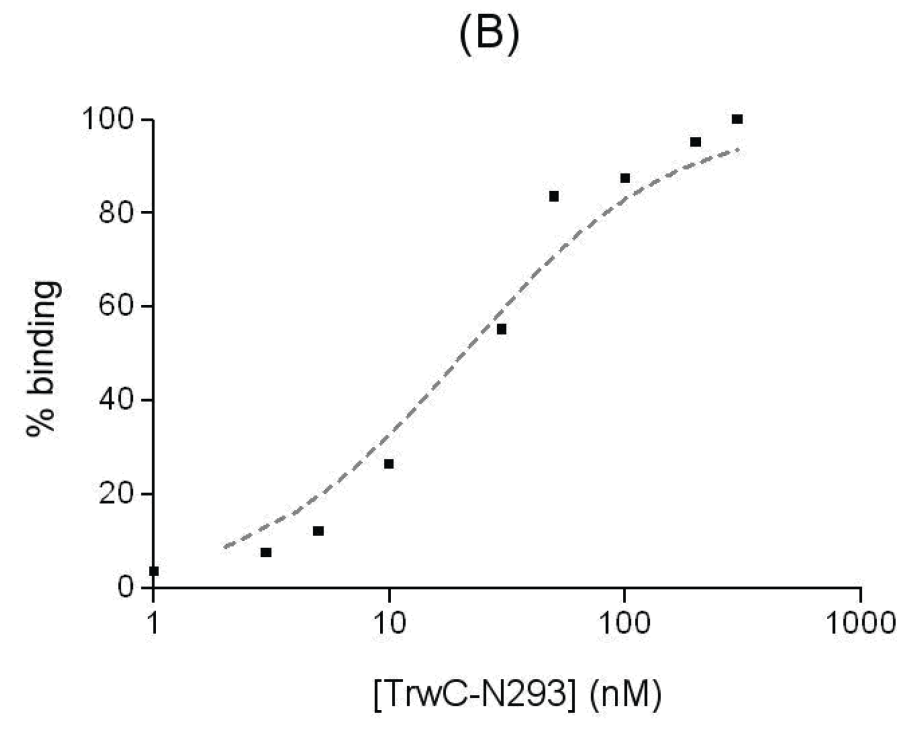

Figure S1

Supplement: supp_M109.057539_jbc.M109.057539-1.pdf [file supp_M109.057539_jbc.M109.057539-1.pdf]

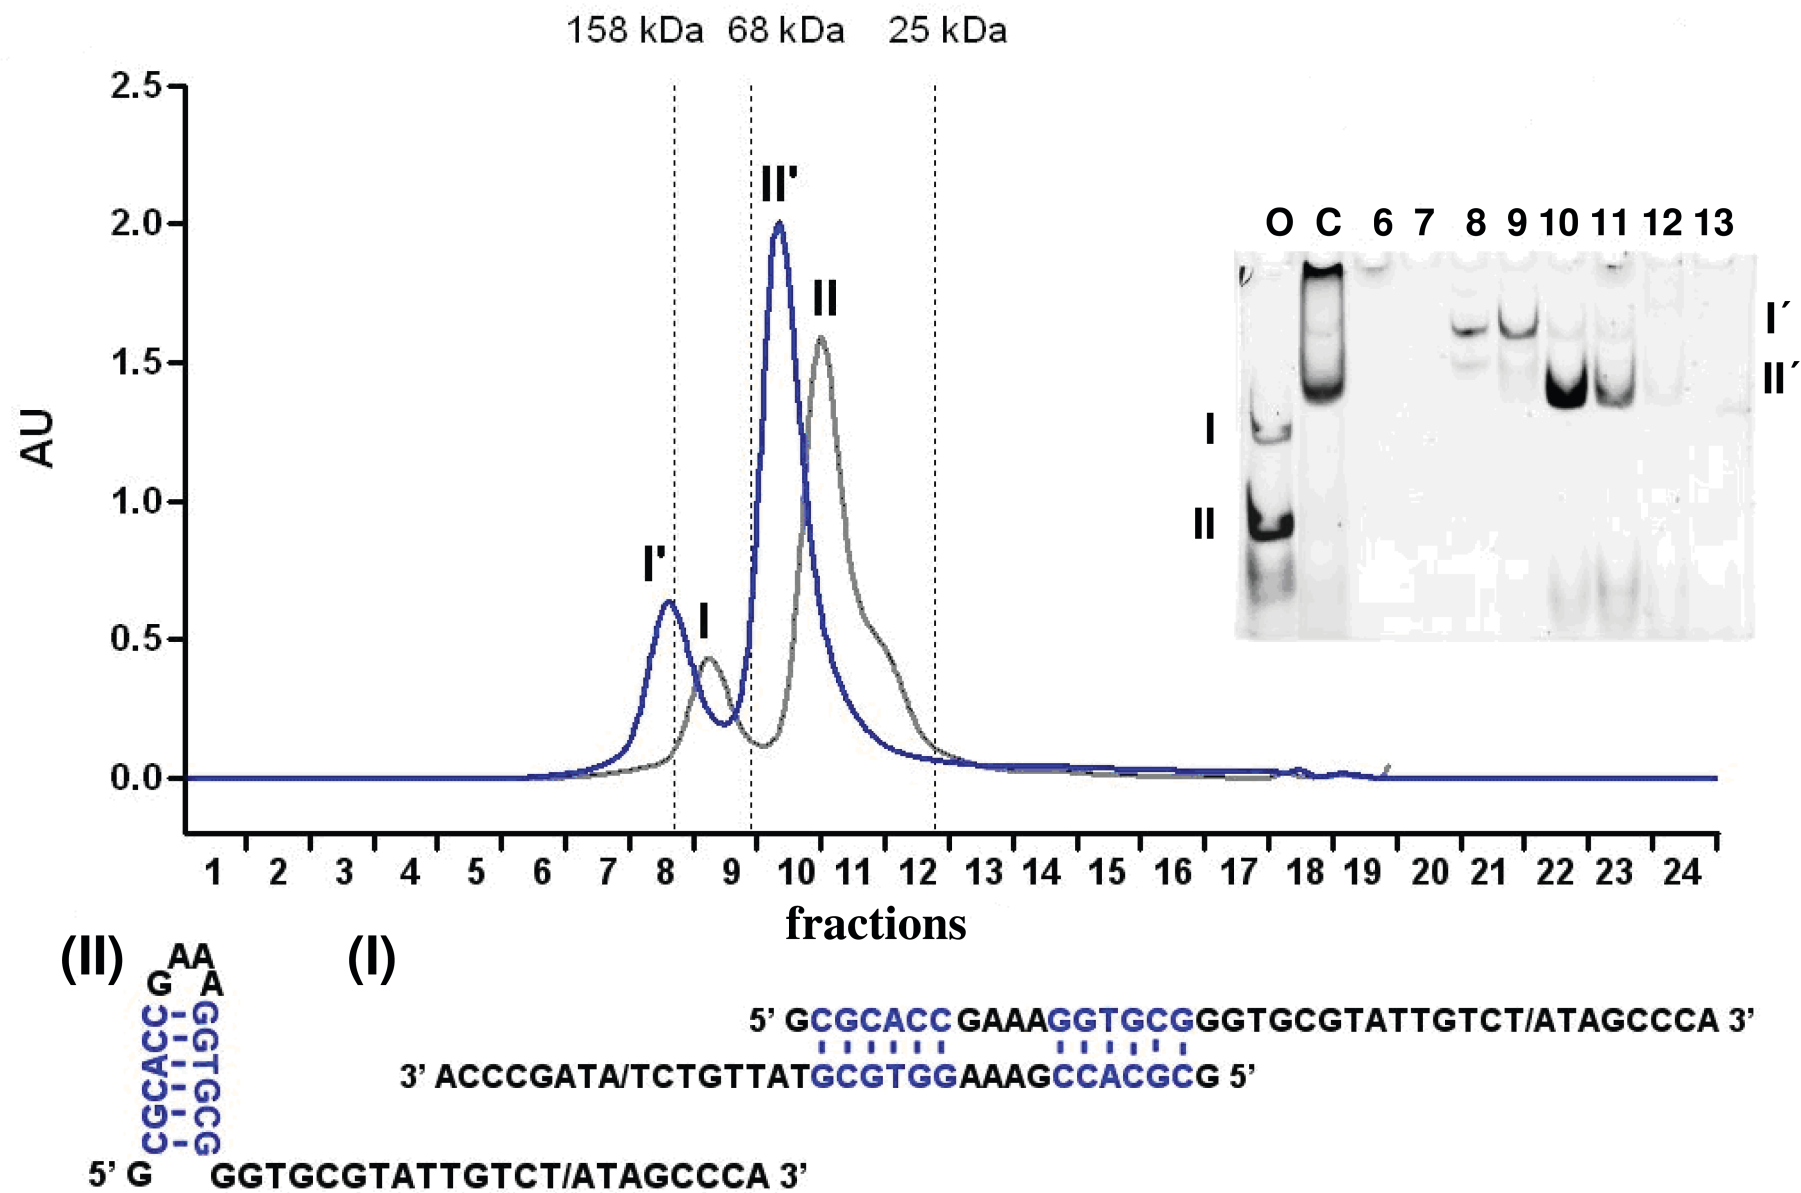

Figure S2

Supplement: supp_M109.057539_jbc.M109.057539-2.pdf [file supp_M109.057539_jbc.M109.057539-2.pdf]
